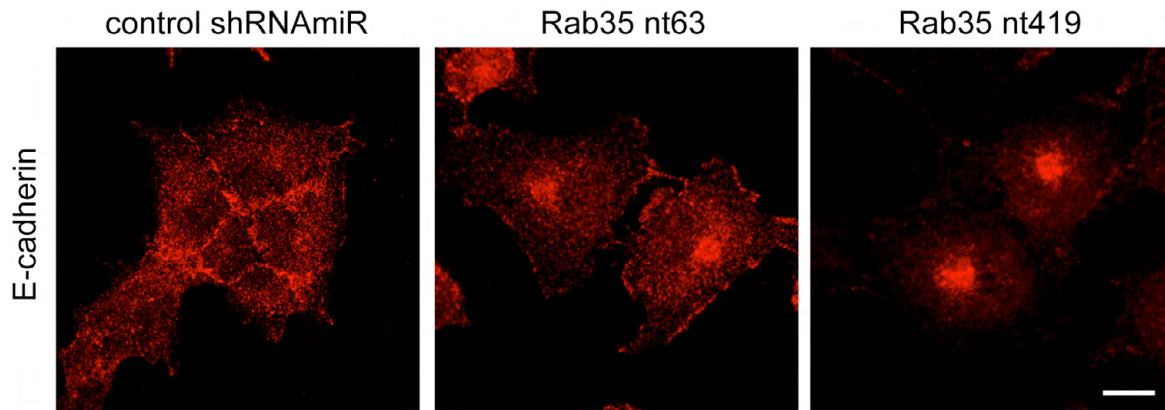

**Fig. S1. Rab35 knock down inhibits recycling of E-cadherin.** COS-7 cells were treated with control shRNAmiR or two different shRNAmiRs targeting Rab35 (Rab35 nt63 and Rab35 nt419) as indicated. Cells were transfected with Flag-tagged E-cadherin and then stained with an anti-Flag antibody. Scale bar = 10  $\mu$ m.

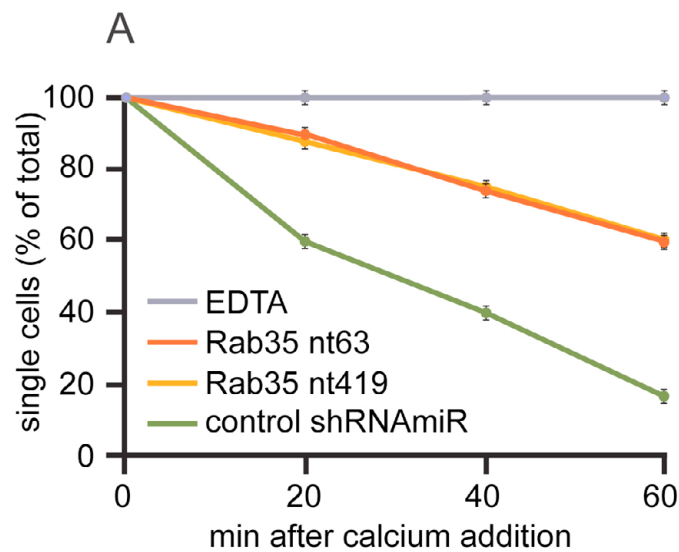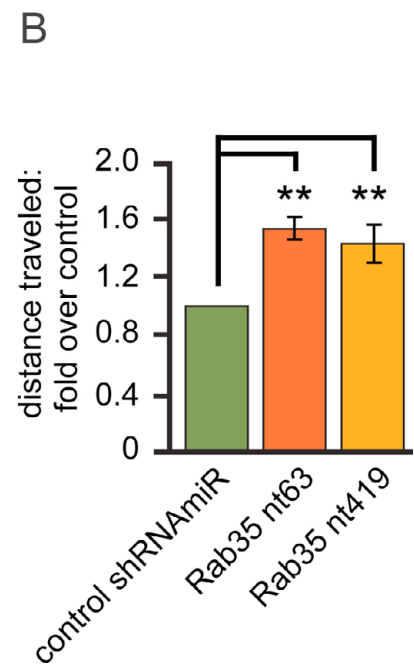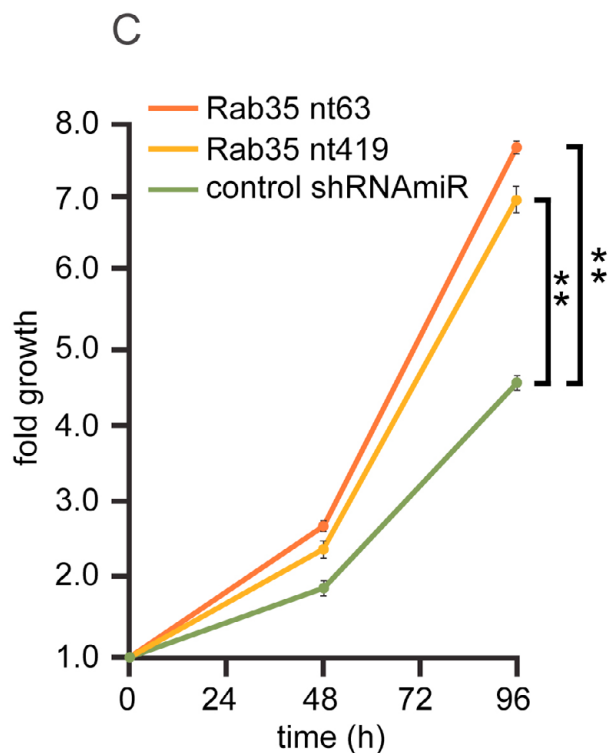

**Fig. S2. Adhesion, migration and proliferation of glioblastoma derived U251 cells.** (A-C) For all panels, U251 glioblastoma-derived cells were treated with control shRNAmiR or two different shRNAmiRs targeting Rab35 (Rab35 nt63 and Rab35 nt419) as indicated. (A) Cells were treated with 2 mM EDTA to dissociate monolayers into single cells. The cells were then pelleted, washed and resuspended in  $\text{Ca}^{2+}$ -containing culture media. Cells were agitated gently and 50  $\mu\text{l}$  aliquots of cell suspension were analyzed at 20 min intervals. Four fields of approximately 200 cells were analyzed per time point from 3 duplicate aggregation assays. Statistical analysis employed a repeated-measure two-way ANOVA followed by a Bonferroni post-test. (B) A scratch was made in a confluent monolayer of cells and images were obtained immediately after the scratch and after 16 h. Cell migration into the scratch was determined from 3 duplicate experiments. Error bars represent standard error of the means and statistical analysis employed a repeated-measure one-way ANOVA followed by a Dunnett's post-test (\*\* $p < 0.01$ ). (C) Cells were plated in 96-well plates at 1000 cells per well. Cell growth at indicated time point represents fold change relative to time 0. The graph represents 8 repeats from 3 separate experiments. Error bars represent standard error of the means. Statistical analysis employed a repeated-measure two-way ANOVA followed by a Bonferroni post-test (\* $p < 0.05$ ).

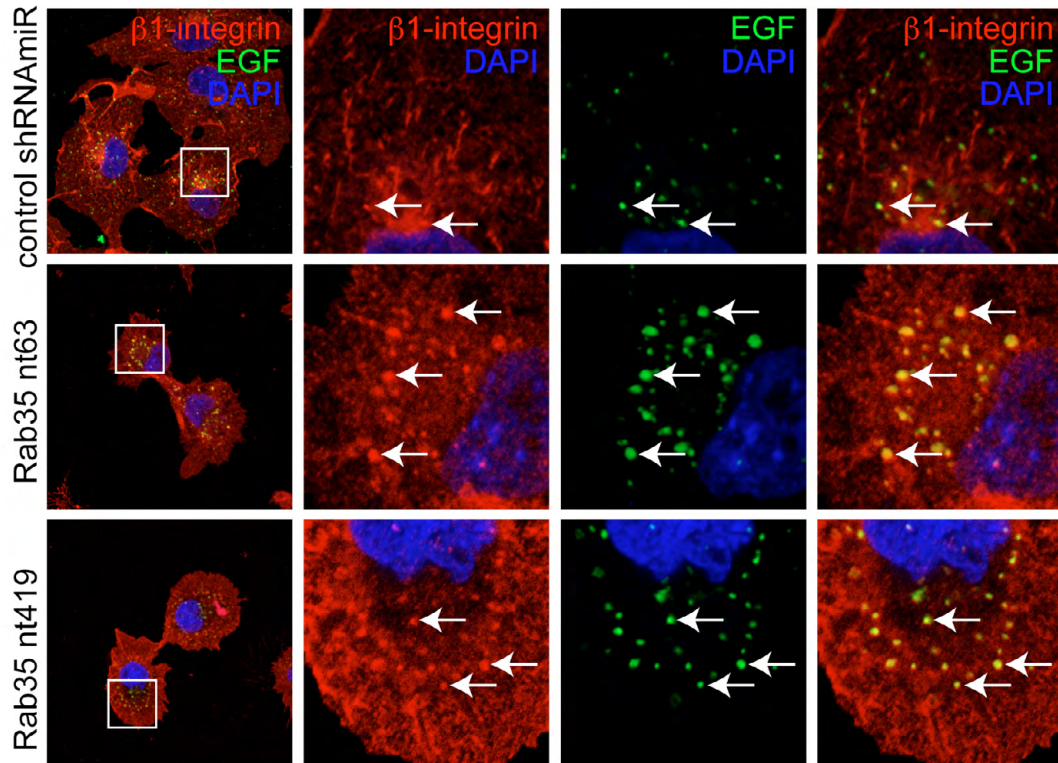

**Fig. S3.**  $\beta 1$ -integrin and internalized EGF show enhanced co-localization following Rab35 knock down. COS-7 cells were treated with control shRNAmiR or two different shRNAmiRs targeting Rab35 (Rab35 nt63 and Rab35 nt419) as indicated. Cells were then serum-starved 2 h and then treated for 10 min with 2 ng/ml Alexa647-labeled EGF. Cells were then fixed and stained for endogenous  $\beta 1$ -integrin along with DAPI to reveal the nucleus. Arrows point to enlarged intracellular vesicles containing EGF and  $\beta 1$ -integrin.

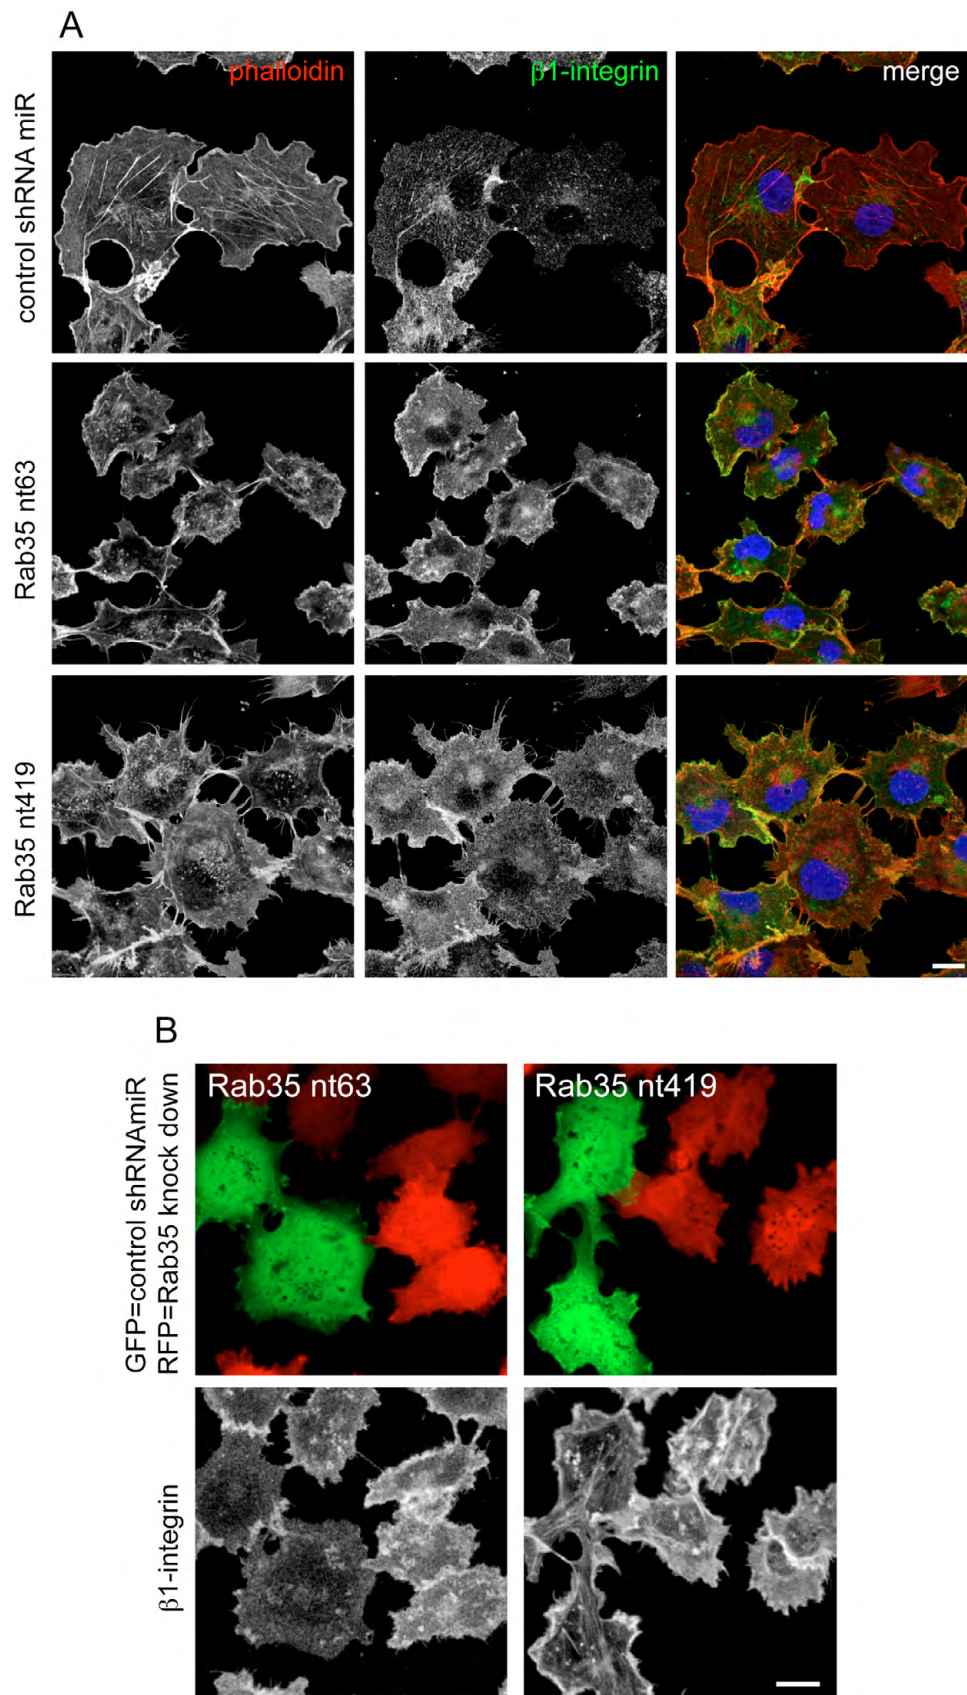

**Fig. S4. Rab35 knock down cells demonstrate alterations in cell morphology.** (A) COS-7 cells were treated with control shRNAmiR or two different shRNAmiRs targeting Rab35 (Rab35 nt63 and Rab35 nt419) as indicated. Cells were then stained with phalloidin to reveal F-actin and with an antibody recognizing  $\beta$ 1-integrin. Scale bar = 10  $\mu$ m. (B) COS-7 cells were treated with control shRNA driven from a plasmid also driving GFP expression or with shRNAs targeting Rab35 (Rab35 nt63 and Rab35 nt419) and driven from a plasmid also driving RFP expression. The cultures were then mixed, fixed and stained for  $\beta$ 1-integrin. Scale bar = 10  $\mu$ m.
